# Supplementary material
Source: publisher figshare collection journal article supplement (https://frontiersin.figshare.com/ndownloader/files/26190092)
Supplement: Supplementary file [file 26190092]

Supplementary Figures

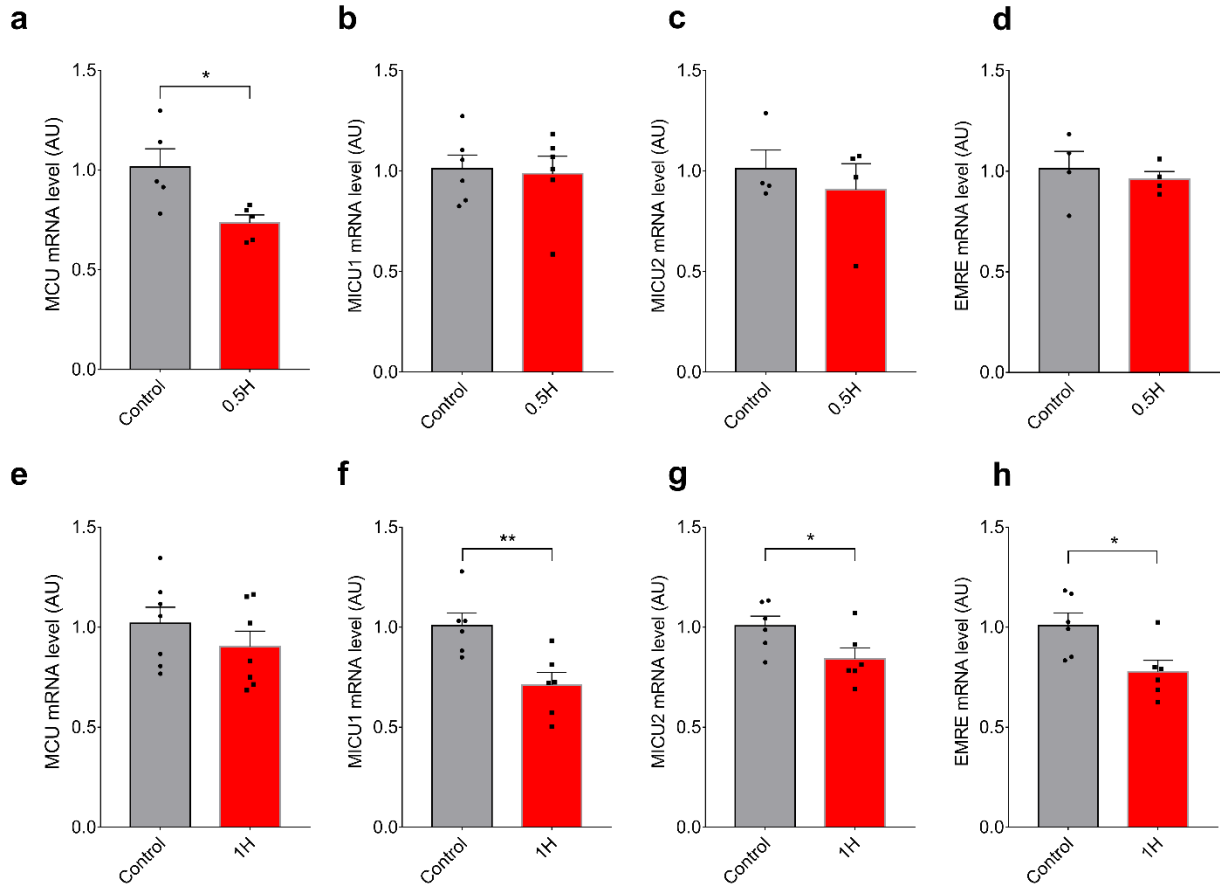

**Supplementary figure 1. Extracellular ATP is enough to reduce mRNA level of the MCU in whole skeletal muscle.** The complete muscle of the *fdb* was extracted and fixed in a chamber with Sylgard using needles. Enzymatic digestion was performed by collagenase IV for 40 min and a rest period of 1 hour. They were then pre-incubated with extracellular ATP (30  $\mu$ M). The mRNA was extracted at 30 min (a-d) and 1H (e-h) post-stimulation. A decrease in MCU was observed at 30 min post-stimulation (a). A decrease in MICU1, MICU2, and EMRE were observed at 1h post-stimulation (f-g). Values are presented as mean  $\pm$  S.E.M. (n = 4-6). P0 was used as a normalizer. \*, p < 0.05; \*\*, p < 0.01; \*\*\*, p < 0.001.

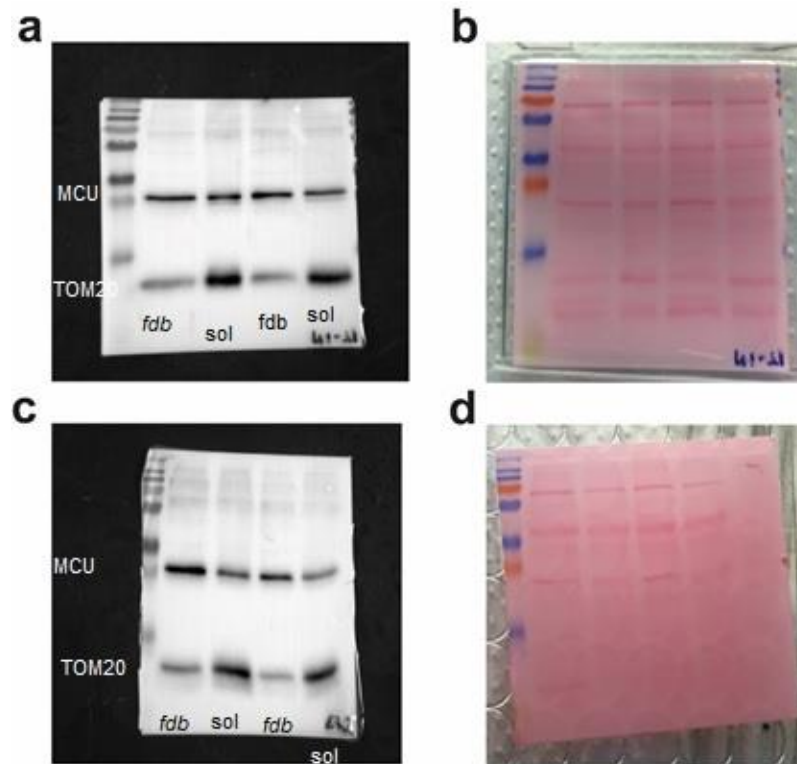

**Supplementary figure 2. MCU and TOM20 bands on PVDF membranes.** In a) and c) the MCU and TOM20 band ( $n = 4$ ) is observed. In b) and d) the membranes are observed with Ponceau red ( $n=4$ ). The samples were taken from complete muscles of the fdb and soleus.

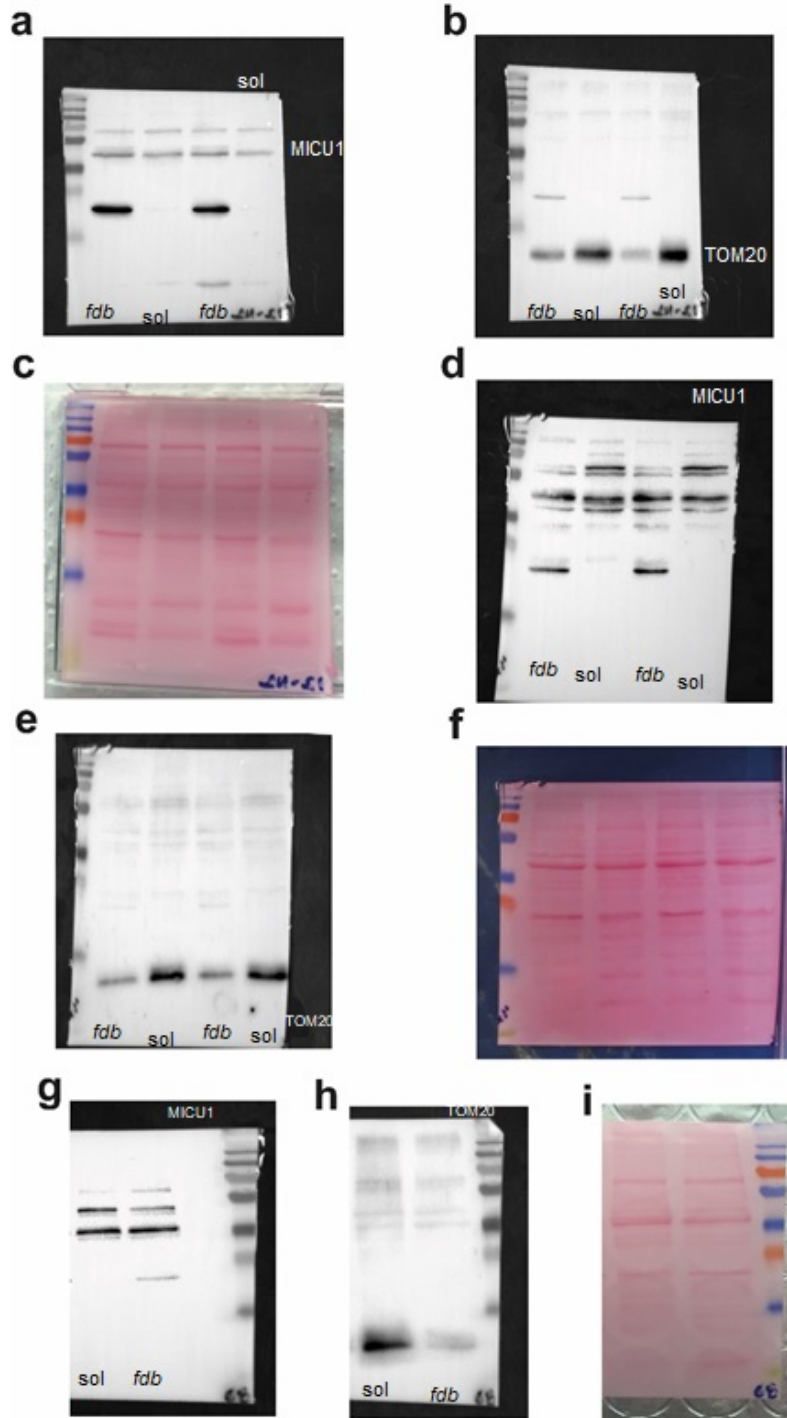

**Supplementary figure 3. MICU1 and TOM20 bands on PVDF membranes.** In a), d) and g) the MICU band is observed in the membranes (n = 5). In b), e) and h) the TOM20 band is observed in the membranes (n = 5). In c), f) and i) the membranes are observed with Ponceau red (n = 5). The samples were taken from the complete muscles of the *fdb* and soleus.

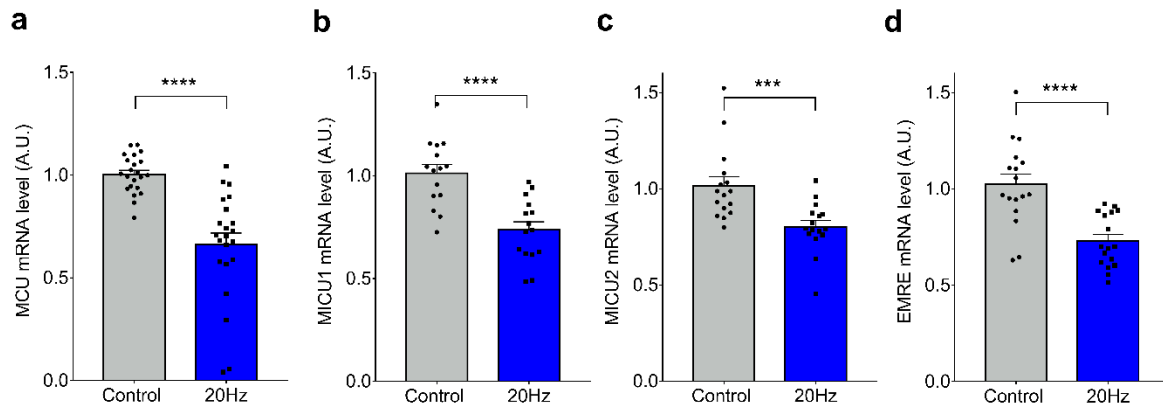

**Supplementary figure 4. Pooled data indicates that low-frequency electrical stimulation (ES) transiently reduces mRNA levels of MCU complex in skeletal muscle fibers.** Muscle fibers isolated from the *Flexor Digitorum Brevis* (*fdb*) muscle were stimulated with 270 pulses, 0.3 ms each (**a-d**) at 20 Hz. mRNA levels of MCU (n=22), MICU1 (n=15), MICU2 (n=16) and EMRE (n=17) decreased 1h post ES. The plates with isolated *fdb* fibers for each condition come from the same animal. For (**a**) and (**b**) using the Mann-Whitney test was applied. Values are presented as mean  $\pm$  S.E.M. (n = 4-6). 18s was used as a normalizer. \*, p < 0.05; \*\*, p < 0.01; \*\*\*, p < 0.001; \*\*\*\*, p < 0.0001.
